# Supplementary material for: Er:YAG laser irradiation enhances bacterial and lipopolysaccharide clearance and human gingival fibroblast adhesion on titanium discs
Source: PubMed Central journal article supplement (PMC8671504; doi:10.1038/s41598-021-03434-1), 2021-12-14
Supplement: 41598_2021_3434_MOESM1_ESM.pdf [file 41598_2021_3434_MOESM1_ESM.pdf]

**Title:**

Er:YAG laser irradiation enhances bacterial and lipopolysaccharide clearance and human gingival fibroblast adhesion on titanium discs

Chen-Ying Wang <sup>1,2#</sup>, Bor-Shiunn Lee <sup>1,3#</sup>, Ya-Ting Jhang <sup>1,4</sup>, Kevin Sheng-Kai Ma <sup>5</sup>,

Chen-Pang Huang <sup>1,4</sup>, Kuan-Lun Fu <sup>1,4</sup>, Chern-Hsiung Lai <sup>6</sup>, Wan-Yu Tseng <sup>1,2</sup>, Mark

Yen-Ping Kuo <sup>1,2</sup>, Yi-Wen Chen <sup>1,4\*</sup>.

\* Corresponding author

# Prof. Wang and Prof. Lee contributed equally to this work as first authors.

<sup>1</sup> Department of Dentistry, National Taiwan University Hospital, Taipei, Taiwan

<sup>2</sup> School of Dentistry, National Taiwan University, Taipei, Taiwan

<sup>3</sup> Graduate Institute of Oral Biology, School of Dentistry, National Taiwan University, Taipei, Taiwan

<sup>4</sup> Graduate Institute of Clinical Dentistry, School of Dentistry, National Taiwan University, Taipei, Taiwan

<sup>5</sup> Department of Life Science, National Taiwan University, Taipei, Taiwan

<sup>6</sup> College of Life Science, Kaohsiung Medical University, Kaohsiung, Taiwan

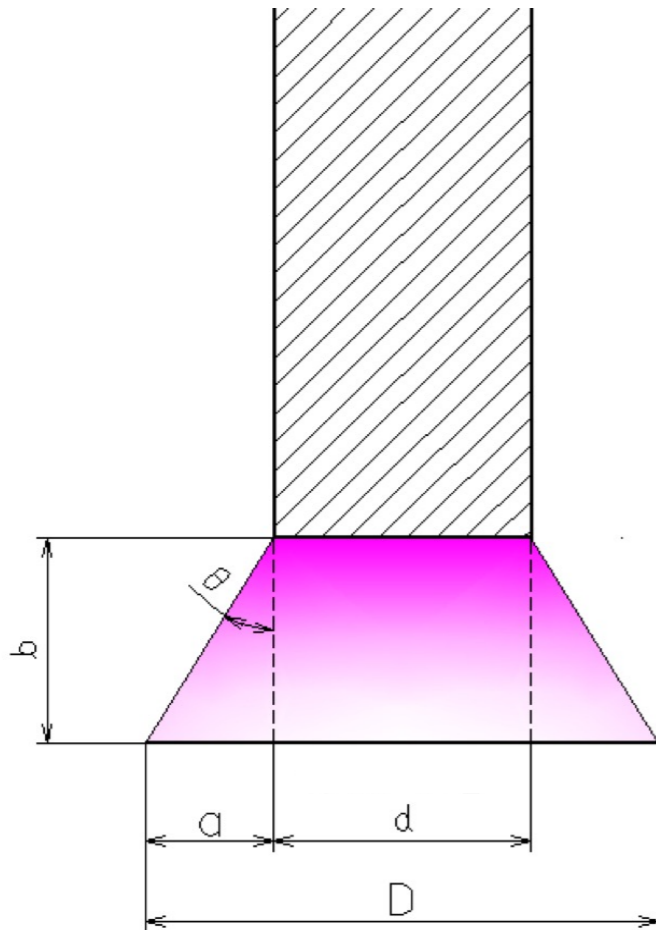

$b$  = distance from tip end  
 $d$  = diameter of the fiber core  
 $\theta$  = beam divergence  
 $D$  = diameter of the fiber varied by distance  $b$   
 $S$  = Irradiation area

$$D = d + 2a = d + 2b \tan \theta$$

$$S = \pi \times D^2 / 4 = \pi \times (d + 2b \tan \theta)^2 / 4$$

$$\text{Radiant exposure} = \text{Radiant energy} \times \text{Tip transmittance} / \text{Irradiation area}(S)$$

$b=0$  mm,  $d=0.6$ mm,  $\theta=5.2$ ,  $D=0.78$  mm,  $S=0.28$  mm<sup>2</sup>

Radiant exposure =  $80\text{mJ} \times 0.62 / 0.28\text{mm}^2 = 177.14$  mJ/mm<sup>2</sup> = **17.714 J/cm<sup>2</sup>**

In our study:

$b=1$  mm,  $d=0.6$ mm,  $\theta=5.2$ ,  $D=0.78$  mm,  $S=0.48$  mm<sup>2</sup>

Radiant exposure =  $80\text{mJ} \times 0.62 / 0.48\text{mm}^2 = 103.33$  mJ/mm<sup>2</sup> = **10.333 J/cm<sup>2</sup>**

The declined rate is  **$10.333 / 17.714 = 0.5833$**

Considering the titanium surface ( $7.5$  mm  $\times$   $7.5$  mm  $\times$   $3.14 = 176.625$  mm<sup>2</sup>) and irradiation time (600 seconds)

The total radiant exposure is

$80$  mJ/pulse  $\times$   $0.62$   $\times$   $25$  pulse/sec  $\times$   $600$  sec  $\times$   $0.5833 / 176.625$  mm<sup>2</sup> =  $2457$  mJ/mm<sup>2</sup> = **245.7 J/cm<sup>2</sup>**
